# Supplementary material
Source: PubMed Central journal article supplement (PMC3421705)
Supplement: JVI.00644-12_zjv999096320so1.pdf [file JVI.00644-12_zjv999096320so1.pdf]

### Supplementary Figure legends

Fig. S1. Rhesus macaque PBMC were infected with the indicated simian SHIV<sub>AD8</sub> stocks at a MOI of 0.01 and progeny virus production was determined by <sup>32</sup>P-RT assay of culture supernatants (38). CPM, counts per minute.

Fig. S2. The dynamics of anti-HIV-1 gp120 antibody binding by ELISA. ELISA was performed on 1:100 dilution of plasma samples collected at the indicated times and are presented as OD values. Color and symbols are the same as described in the legend for Fig. 3.

Figure S1

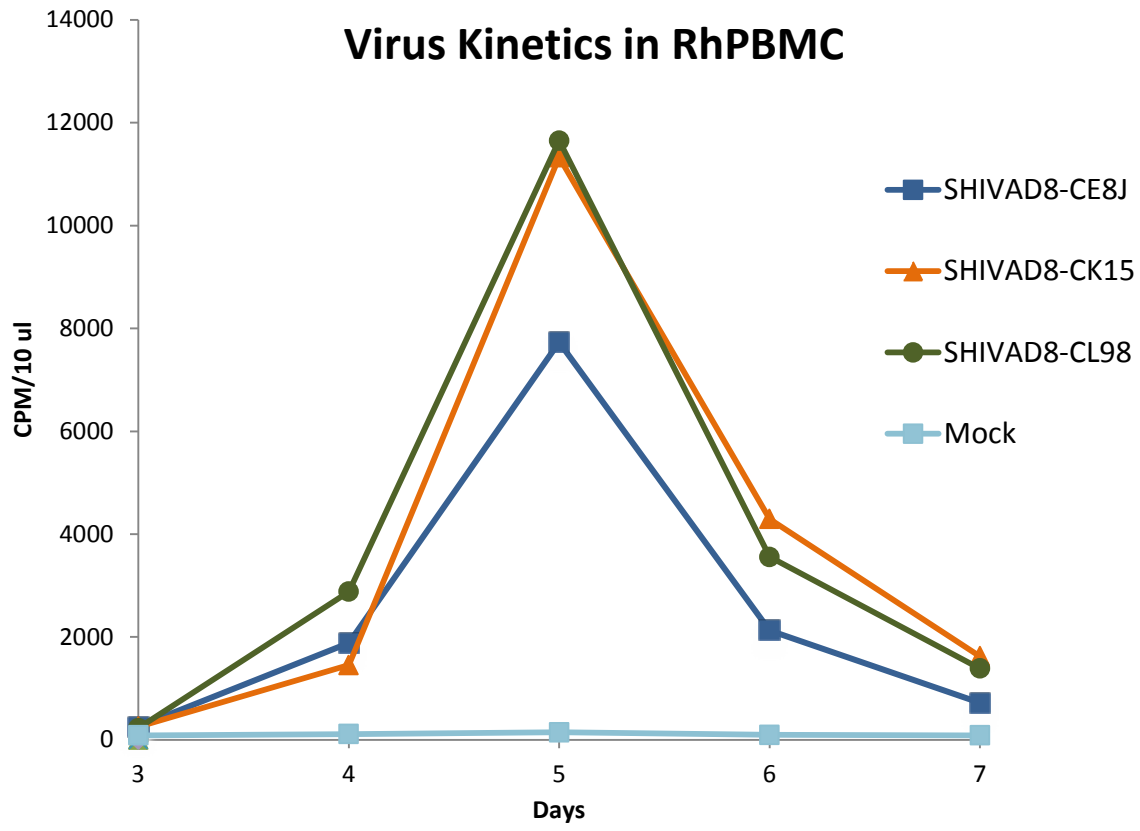

Figure S2

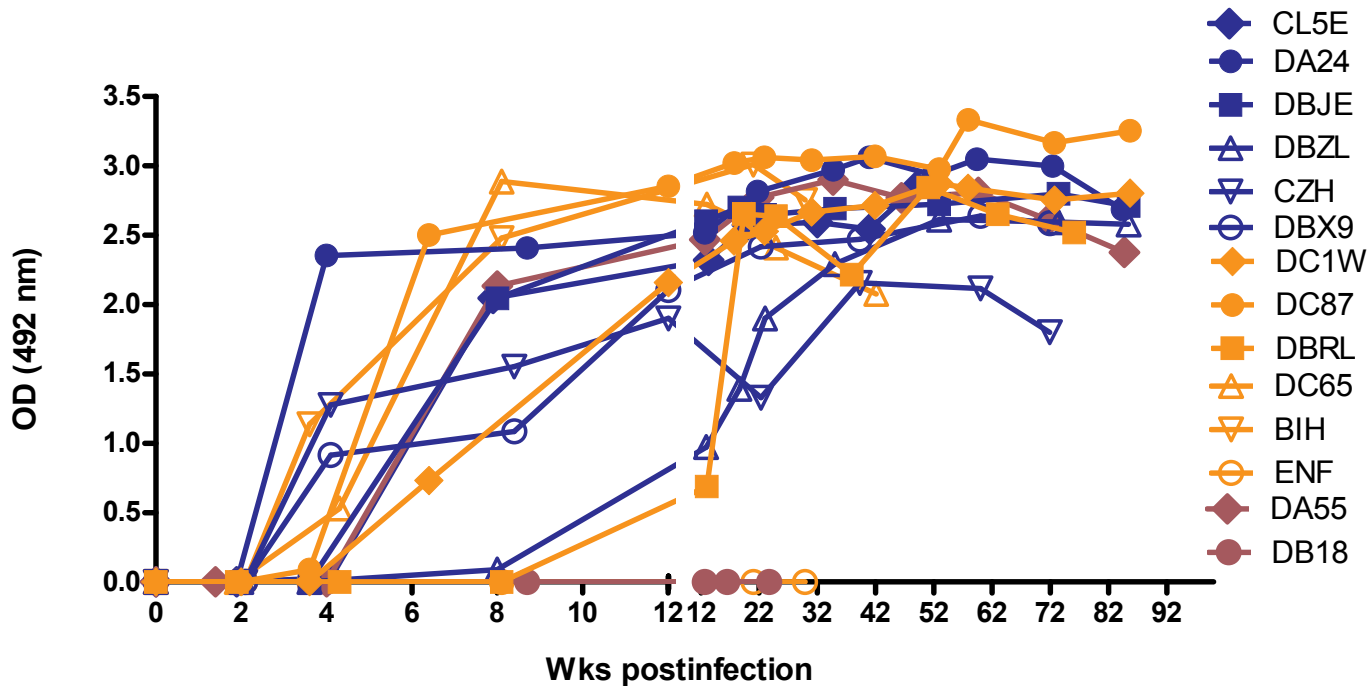

**Table S1.** Virus specific immune responses in SHIV<sub>AD8</sub> infected animals

| Animal ID | Inoculum                 | PBMC collection<br>(wk p.i.) | % TNF <sup>+</sup> and/or IFN $\gamma$ <sup>+</sup> Memory<br>CD4 <sup>+</sup> T cells | % TNF <sup>+</sup> and/or IFN $\gamma$ <sup>+</sup> Memory<br>CD8 <sup>+</sup> T cells |
|-----------|--------------------------|------------------------------|----------------------------------------------------------------------------------------|----------------------------------------------------------------------------------------|
| DB93      | SHIV <sub>AD8-CE8J</sub> | 15.3                         | 0.70                                                                                   | 0.43                                                                                   |
| DB1A      | SHIV <sub>AD8-CE8J</sub> | 45.3                         | 0.91                                                                                   | 1.04                                                                                   |
| DA24      | SHIV <sub>AD8-CE8J</sub> | 77.6                         | 1.09                                                                                   | 0.69                                                                                   |
| DBJE      | SHIV <sub>AD8-CE8J</sub> | 78.6                         | 0.55                                                                                   | 1.78                                                                                   |
| DBZL      | SHIV <sub>AD8-CE8J</sub> | 78.6                         | 1.95                                                                                   | 1.18                                                                                   |
| CZH       | SHIV <sub>AD8-CE8J</sub> | 65.0                         | 0.89                                                                                   | 0.00                                                                                   |
| DBX9      | SHIV <sub>AD8-CE8J</sub> | 65.0                         | 1.58                                                                                   | 1.08                                                                                   |
| CJ7D      | SHIV <sub>AD8-CK15</sub> | 64.3                         | 1.57                                                                                   | 0.58                                                                                   |
| DC1W      | SHIV <sub>AD8-CK15</sub> | 78.6                         | 0.71                                                                                   | 0.62                                                                                   |
| DBRL      | SHIV <sub>AD8-CK15</sub> | 69.0                         | 1.11                                                                                   | 0.15                                                                                   |
| A3E051    | SHIV <sub>AD8-CL98</sub> | 52.0                         | 4.02                                                                                   | 0.00                                                                                   |
| DA55      | SHIV <sub>AD8-CL98</sub> | 77.6                         | 2.43                                                                                   | 0.82                                                                                   |
| CL5B      | SHIV <sub>AD8-CL98</sub> | 53.6                         | 2.41                                                                                   | 0.38                                                                                   |

**Table S2.** Development of autologous and heterologous Nabs in SHIV<sub>AD8</sub> infected macaques

| Animal | Inoculum                 | TZM-bl assay [pseudotype virus<br>(SHIV <sub>AD8</sub> Env clone)] |               |                                   |
|--------|--------------------------|--------------------------------------------------------------------|---------------|-----------------------------------|
|        |                          | Neut assay<br>(Weeks p.i.)                                         | Neut response | % Neut at 1:20<br>plasma dilution |
| DB93   | SHIV <sub>AD8-CE8J</sub> | 22                                                                 | —             |                                   |
| DB1A   | SHIV <sub>AD8-CE8J</sub> | 84                                                                 | —             |                                   |
| CL5E   | SHIV <sub>AD8-CE8J</sub> | 51                                                                 | —             |                                   |
| DA24   | SHIV <sub>AD8-CE8J</sub> | 41                                                                 | +             | 65.39                             |
| DBJE   | SHIV <sub>AD8-CE8J</sub> | 42                                                                 | +             | 90.04                             |
| DBZL   | SHIV <sub>AD8-CE8J</sub> | 42                                                                 | —             |                                   |
| CZH    | SHIV <sub>AD8-CE8J</sub> | 44                                                                 | —             |                                   |
| DBX9   | SHIV <sub>AD8-CE8J</sub> | 44                                                                 | —             |                                   |
| CJ7D   | SHIV <sub>AD8-CK15</sub> | 86                                                                 | —             |                                   |
| A3E050 | SHIV <sub>AD8-CK15</sub> | 39                                                                 | —             |                                   |
| DC1W   | SHIV <sub>AD8-CK15</sub> | 58                                                                 | —             |                                   |
| DC87   | SHIV <sub>AD8-CK15</sub> | 58                                                                 | —             |                                   |
| DBRL   | SHIV <sub>AD8-CK15</sub> | 48                                                                 | —             |                                   |
| DC65   | SHIV <sub>AD8-CK15</sub> | 48                                                                 | —             |                                   |
| A3E051 | SHIV <sub>AD8-CL98</sub> | 87                                                                 | —             |                                   |
| DA55   | SHIV <sub>AD8-CL98</sub> | 57                                                                 | +             | 75.48                             |
| DB18   | SHIV <sub>AD8-CL98</sub> | 47                                                                 | —             |                                   |
| CL5B   | SHIV <sub>AD8-CL98</sub> | 29                                                                 | —             |                                   |
| DB0F   | SHIV <sub>AD8-CL98</sub> | 33                                                                 | —             |                                   |

Neut, neutralization
